# Supplementary material for: Dickkopf-1 Acts as a Profibrotic Mediator in Progressive Chronic Kidney Disease
Source: MDPI journal article supplement (doi:10.3390/ijms24087679), 2023-04-21
Supplement: s1 [file s1]

## Supplementary Table and Figures

**Table S1. Serum DKK1 levels (pg/ml) in healthy controls and CKD patients**

| Characteristics           | Mean $\pm$ SD      | Median (Range)            |
|---------------------------|--------------------|---------------------------|
| Healthy controls (n = 15) | 176.2 $\pm$ 132.2  | 166.0 (2.2 to 493.7)      |
| CKD patients (n = 50)     | 1559.4 $\pm$ 701.6 | 1440.0 (574.8 to 4581.6)  |
| CKD/DKK1-high (n = 22)    | 2130.8 $\pm$ 657.0 | 1996.8 (1526.4 to 4581.6) |
| CKD/DKK1-low (n = 28)     | 1110.6 $\pm$ 287.5 | 1136.4 (574.8 to 1462.8)  |

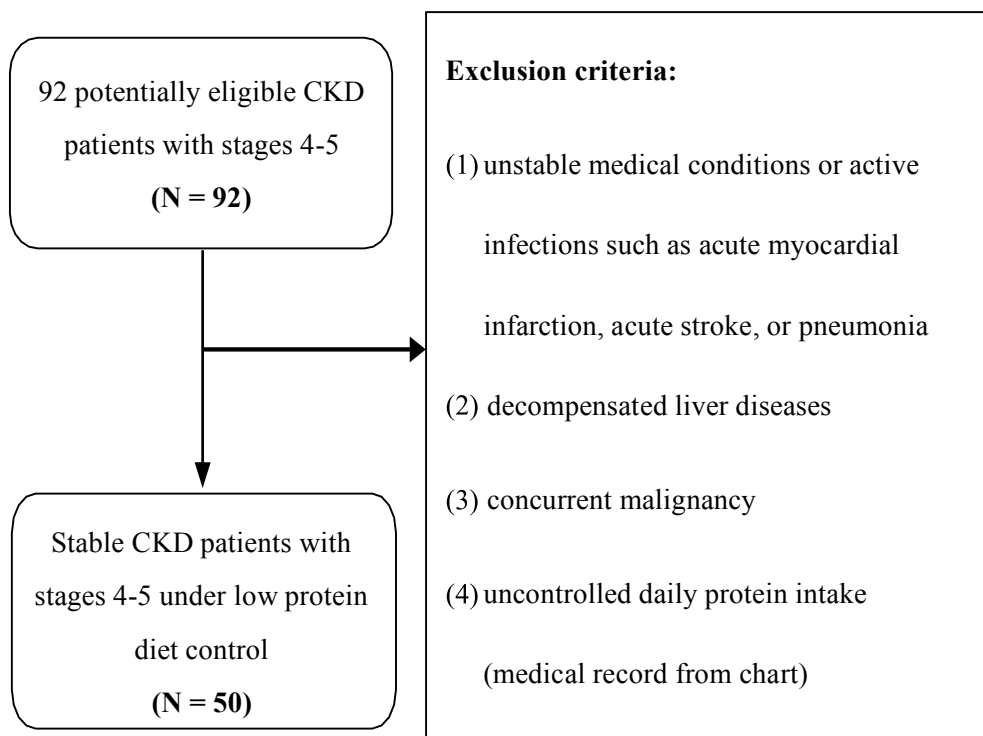

**Figure S1.** The flow chart of CKD patient recruitment and exclusion.

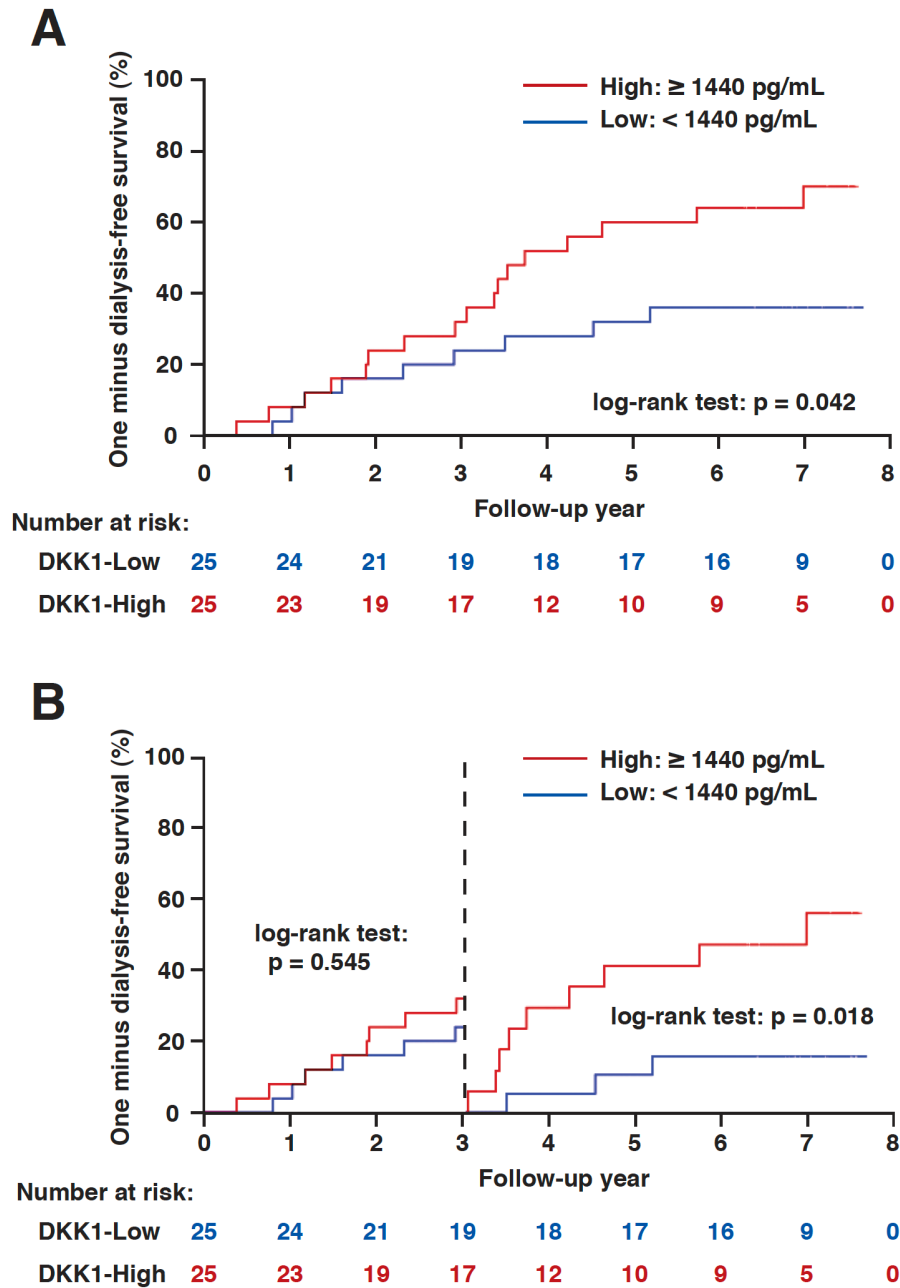

**Figure S2.** Kaplan-Meier analysis of dialysis-free survival in CKD patients with high or low serum DKK1. (A) One minus dialysis-free survival analysis for the serum DKK1-high ( $\geq 1440$  pg/mL;  $n = 25$ ) and DKK1-low ( $< 1440$  pg/mL;  $n = 25$ ) subgroups of CKD patients with stages 4-5 (log-rank test). (B) Stratification by 3-year follow-up in the serum DKK1-high and DKK1-low subgroups.

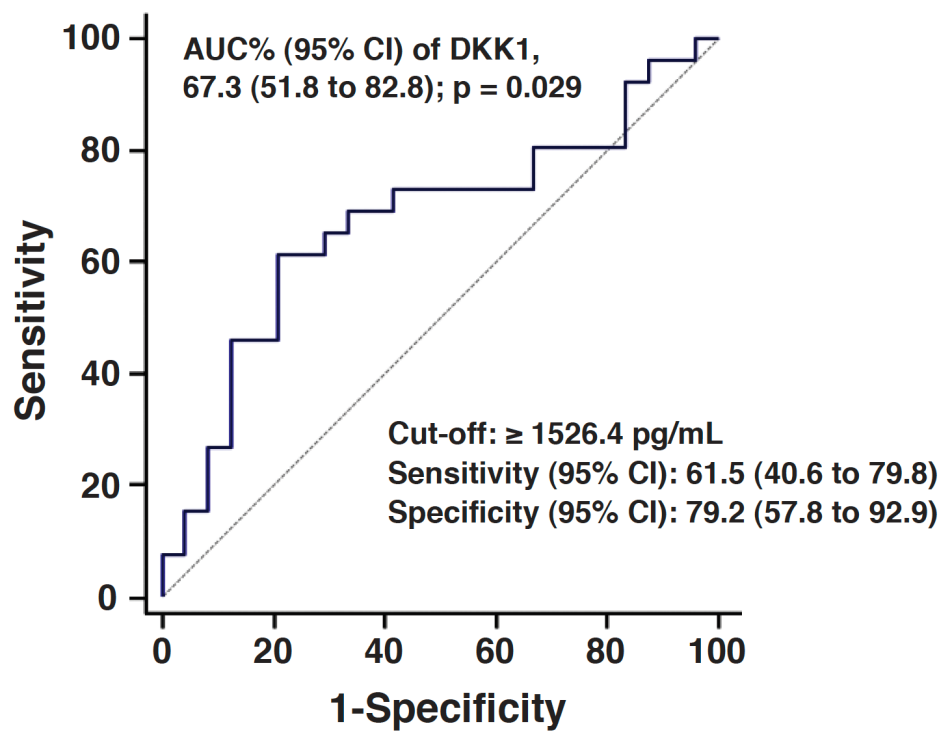

**Figure S3.** The ROC curve for the optimal cutoff point of serum DKK1 concentration. The most discrimination cutoff level for serum DKK1 was 1526.4 pg/mL with an AUC value of 0.673 ( $p = 0.029$ ).

| <b>Gene name</b>       | <b>Primer Sequences (5'-3')</b>               | <b>Product size (bp)</b> |
|------------------------|-----------------------------------------------|--------------------------|
| DKK1 (rat)             | TTACTGTGGGGAAGGTCTGG<br>ACATCCTTGGGATTGAGCTG  | 178                      |
| FBN (rat)              | GTGGCTGCCTTCAACTTCTC<br>AGTCCTTTAGGGCGGTCAAT  | 231                      |
| TGF- $\beta$ 1 (rat)   | TGAGTGGCTGTCTTTTGACG<br>TGGGACTGATCCCATTTGATT | 154                      |
| Actin (rat)            | CGCCAACCGCGAGAAGAT<br>CGTCACCGGAGTCCATCA      | 168                      |
| DKK1 (mouse)           | TCCGTCTGCCTCCGATCATC<br>GCCTTTCCGTTTGTGCTTGG  | 123                      |
| FBN (mouse)            | AATGGAAAAGGGGAATGGAC<br>CTCGGTTGTCCTTCTTGCTC  | 244                      |
| TGF- $\beta$ 1 (mouse) | TTGCTTCAGCTCCACAGAGA<br>TGGTTGTAGAGGGCAAGGAC  | 183                      |
| Actin (mouse)          | AGCCATGTACGTAGCCATCC<br>CTCTCAGCTGTGGTGGTGAA  | 228                      |

**Figure S4.** Primer sequences for quantitative RT-PCR.
